# Supplementary material for: P-Stereodefined phosphorothioate analogs of glycol nucleic acids—synthesis and structural properties
Source: Royal Society of Chemistry journal article supplement (doi:10.1039/c8ra05568h), 2018-01-01
Supplement: c8ra05568h1.pdf [file c8ra05568h1.pdf]

Electronic Supplementary Information  
Phosphorothioate Analogs of Glycol Nucleic Acids

## Synthesis and Structural Properties of P-Stereodefined Phosphorothioate Analogs of Glycol Nucleic Acids.

Agnieszka Tomaszewska-Antczak, Anna Maciaszek, Katarzyna Jastrzębska,  
Barbara Mikołajczyk, Piotr Guga

Centre of Molecular and Macromolecular Studies, Polish Academy of Sciences, Department of  
Bioorganic Chemistry, Sienkiewicza 112. 90-363 Łódź, Poland

**Table 1S.** HRMS data for **5a-d** (unseparated P-diastereomers) and physico-chemical characteristics of *fast* and *slow*-eluting pairs of enantiomers of **5a-d**. A mixture of EtOAc and hexane at given ratio (v/v) was used for TLC and HPLC analyses.

|                                           | <b>5a</b><br>OTP- <sup>G</sup> T |          | <b>5b</b><br>OTP- <sup>G</sup> A <sup>Bz</sup> |          | <b>5c</b><br>OTP- <sup>G</sup> C <sup>Bz</sup> |          | <b>5d</b><br>OTP- <sup>G</sup> G <sup>iBu</sup> |          |
|-------------------------------------------|----------------------------------|----------|------------------------------------------------|----------|------------------------------------------------|----------|-------------------------------------------------|----------|
| HRMS <sup>c)</sup> (Da)                   | calc.                            | 707.2015 |                                                | 820.2392 |                                                | 796.2280 |                                                 | 802.2498 |
|                                           | found                            | 707.2015 |                                                | 820.2400 |                                                | 796.2287 |                                                 | 802.2514 |
| EtOAc : hexane                            | 50 : 50                          |          | 45 : 55                                        |          | 55 : 45                                        |          | 85 : 15                                         |          |
| <i>fast</i> / <i>slow</i>                 | <i>f</i>                         | <i>s</i> | <i>f</i>                                       | <i>s</i> | <i>f</i>                                       | <i>s</i> | <i>f</i>                                        | <i>s</i> |
| TLC, R <sub>f</sub>                       | 0.68                             | 0.60     | 0.72                                           | 0.58     | 0.70                                           | 0.58     | 0.65                                            | 0.50     |
| HPLC <sup>a)</sup> , R <sub>t</sub> (min) | 19.2                             | 21.5     | 18.0                                           | 23.0     | 27.0                                           | 31.2     | 13.5                                            | 17.0     |
| δ <sup>31</sup> P NMR <sup>b)</sup> (ppm) | 105.6                            | 106.1    | 105.8                                          | 106.6    | 105.1                                          | 105.7    | 106.1                                           | 106.5    |

a) A Pursuit XRs column (10μ silica, 100 Å; 250 × 21.2 mm; flow rate 25 mL min<sup>-1</sup>);

b) In CDCl<sub>3</sub>;

In principle, the phosphitylation of eight <sup>DMT-G</sup>N's (obtained from 2 enantiomeric glycidols and 4 nucleobases) should provide 16 OTP-<sup>G</sup>N's, but because **4d** was obtained only from (*R*)-(+)-glycidol we actually have obtained 14 diastereomerically different OTP-<sup>G</sup>N's. However, Table 1S does not contain 14 data sets but only 8 (**5a** *fast/slow* to **5d** *fast/slow*) because each of **5a-c** consists of two pairs of enantiomers (*R<sub>P</sub>R<sub>C</sub>*/*S<sub>P</sub>S<sub>C</sub>* and *S<sub>P</sub>R<sub>C</sub>*/*R<sub>P</sub>S<sub>C</sub>*) and within each pair the components cannot be distinguished by the chromatographic and spectroscopic methods applied (no chiral auxiliaries were used). From this perspective **5d** consisted of two diastereomeric *R<sub>P</sub>S<sub>C</sub>* and *S<sub>P</sub>S<sub>C</sub>* components.

Electronic Supplementary Information  
Phosphorothioate Analogs of Glycol Nucleic Acids

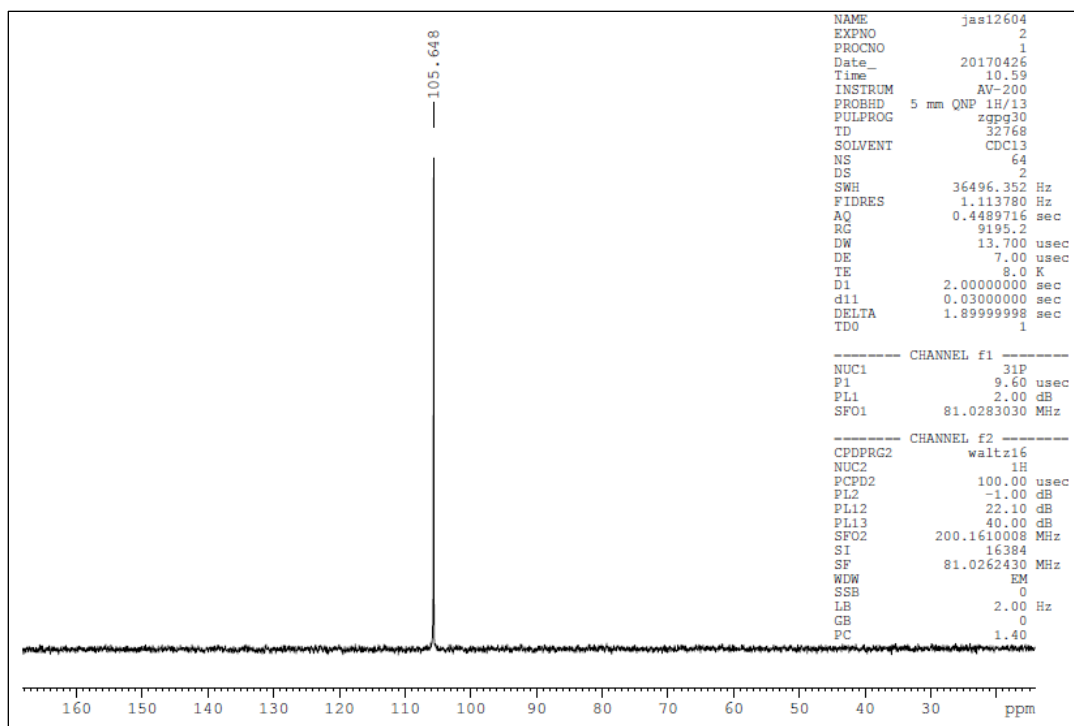

Panel A – isomer *fast*

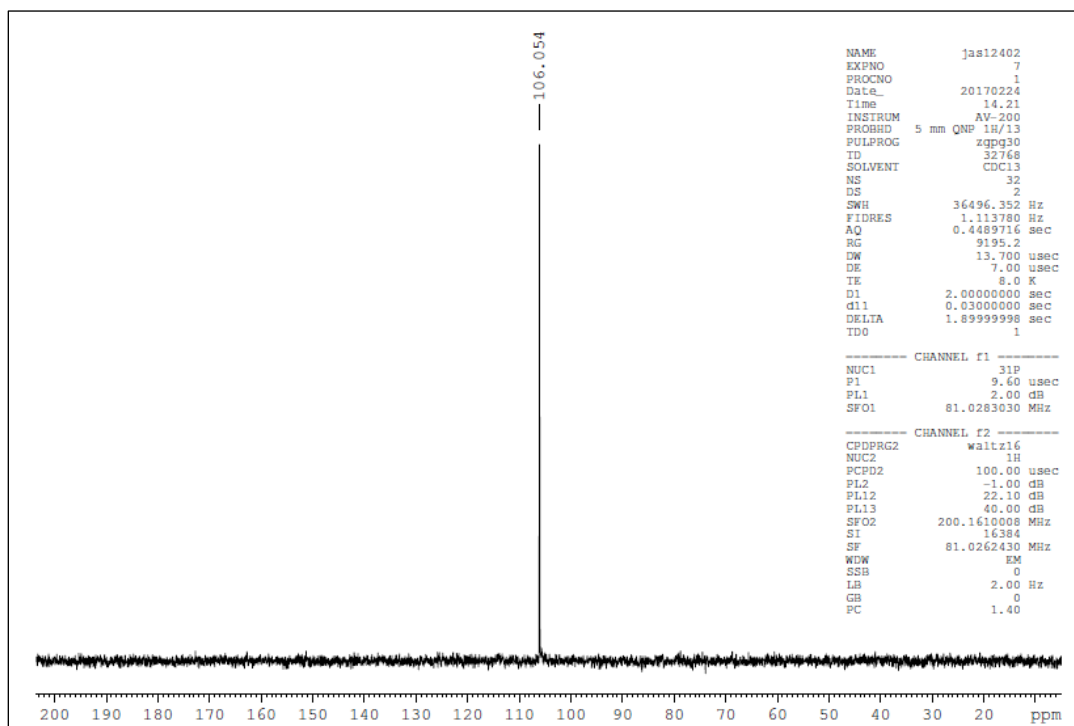

Panel B – isomer *slow*

Figure 1S.  $^{31}\text{P}$  NMR spectra ( $\text{CDCl}_3$ ) for *fast*- and *slow*-eluting **5a**, panel A and B, respectively; recorded with a Bruker AV-200 spectrometer (200 MHz).

Electronic Supplementary Information  
Phosphorothioate Analogs of Glycol Nucleic Acids

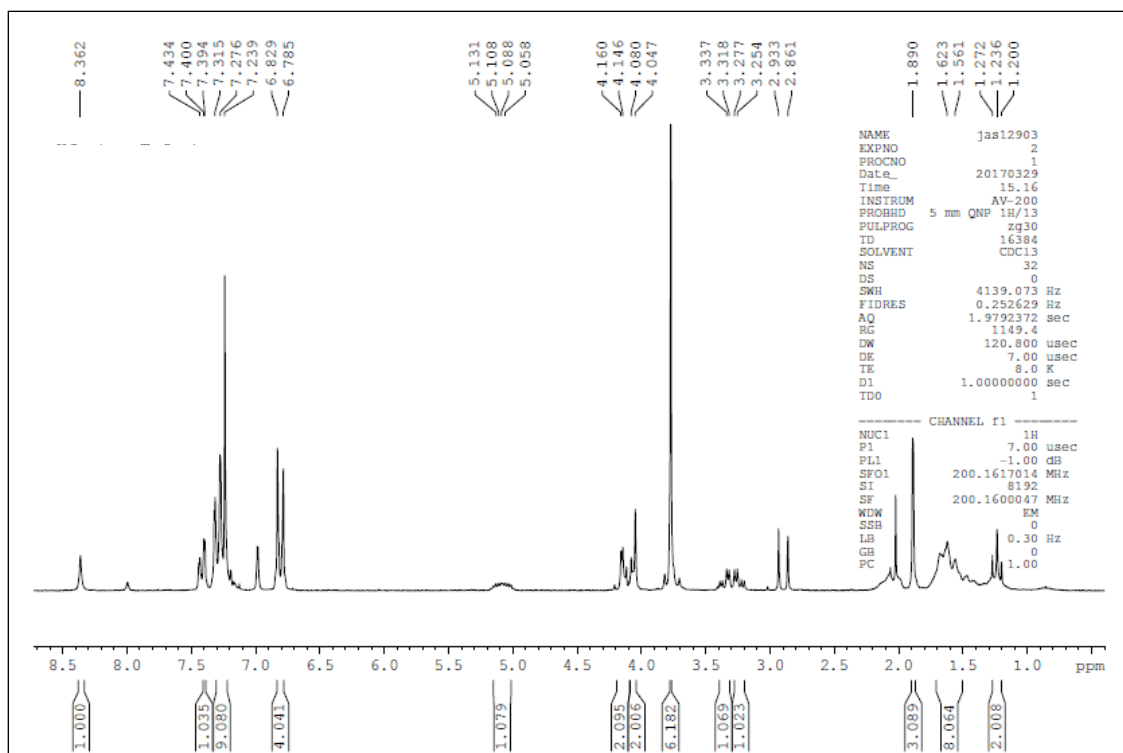

Panel A

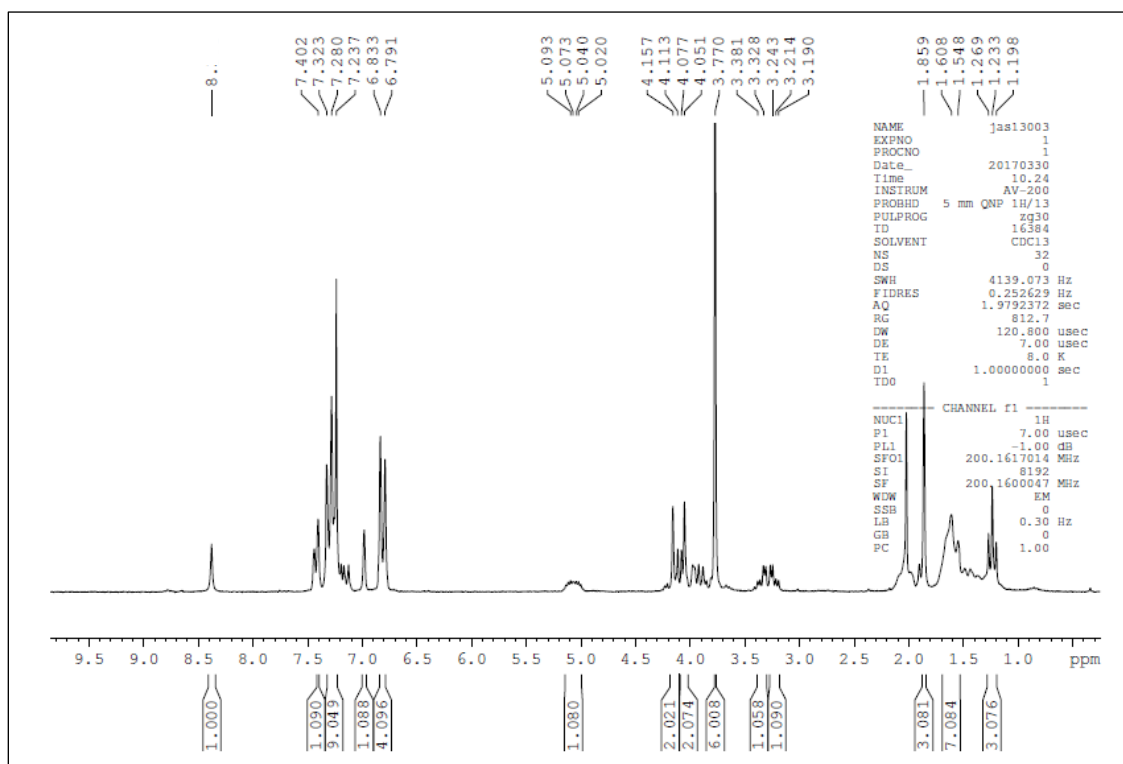

Panel B

Figure 2S.  $^1\text{H}$  NMR spectra ( $\text{CDCl}_3$ ) for *fast*-eluting and *slow*-eluting **5a**, panel A and B, respectively; recorded with a Bruker AV-200 spectrometer (200 MHz).

Electronic Supplementary Information  
Phosphorothioate Analogs of Glycol Nucleic Acids

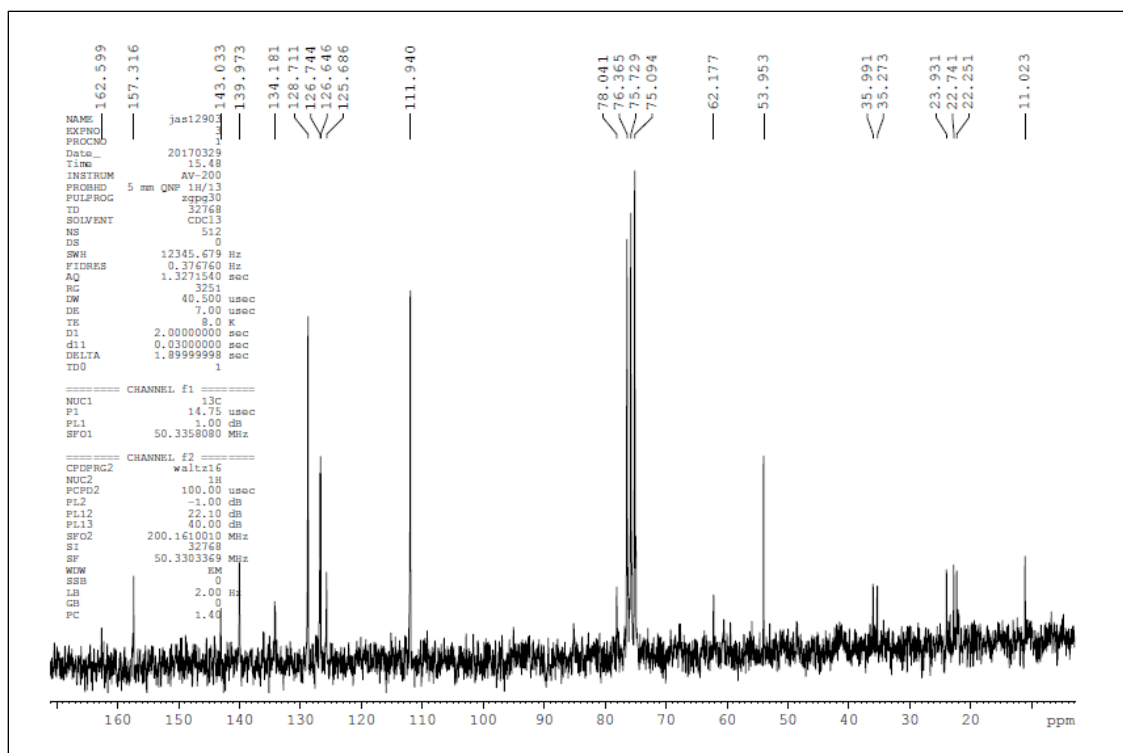

Panel A

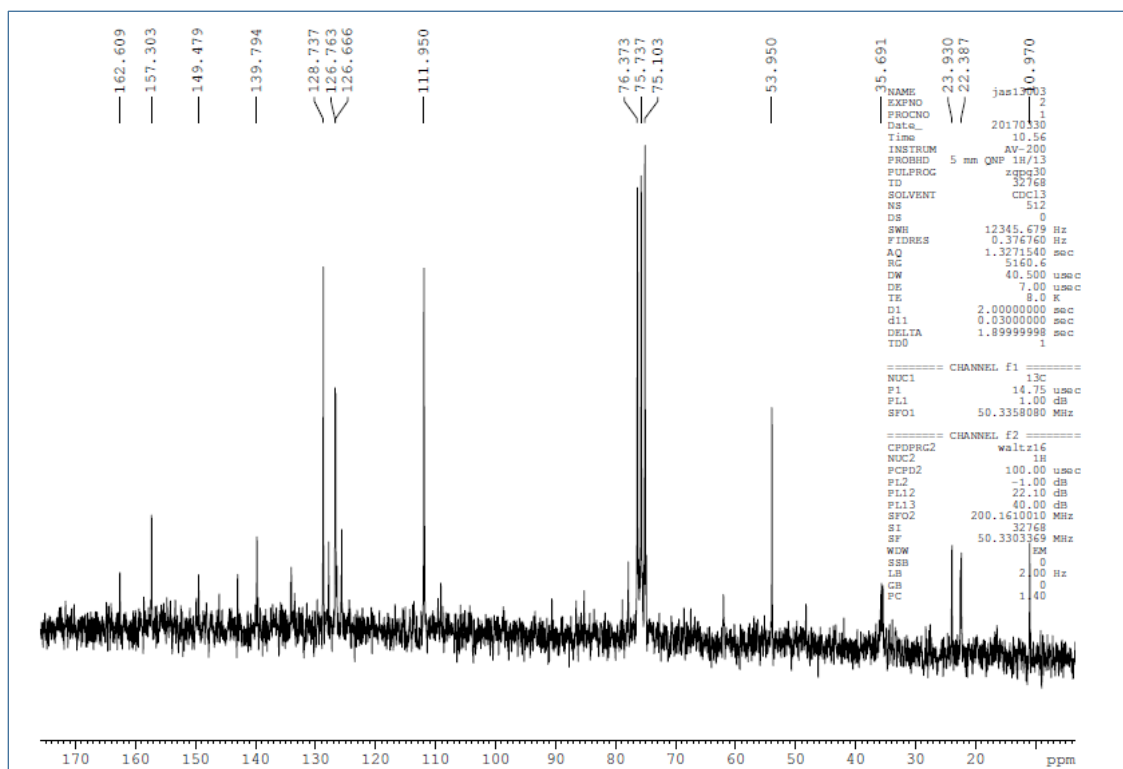

Panel B

Figure 3S.  $^{13}\text{C}$  NMR spectra ( $\text{CDCl}_3$ ) for *fast*-eluting and *slow*-eluting **5a**, panel A and B, respectively; recorded with a Bruker AV-200 spectrometer (200 MHz).

## Elemental Composition Report

Page 1

Tolerance = 5.0 mDa / DBE: min = -1.5, max = 50.0

Element prediction: Off

Number of isotope peaks used for i-FIT = 3

Monoisotopic Mass, Even Electron Ions

332 formula(e) evaluated with 3 results within limits (up to 50 closest results for each mass)

Elements Used:

C: 0-38 H: 0-45 N: 0-3 O: 0-8 P: 0-2 S: 0-2

A. Antczak

180508\_ATA\_10\_neg\_2 9 (0.228) AM2 (Ar,40000.0,0.00,0.00); Cm (7:14-38:63)

1: TOF MS ES-  
1.09e+005

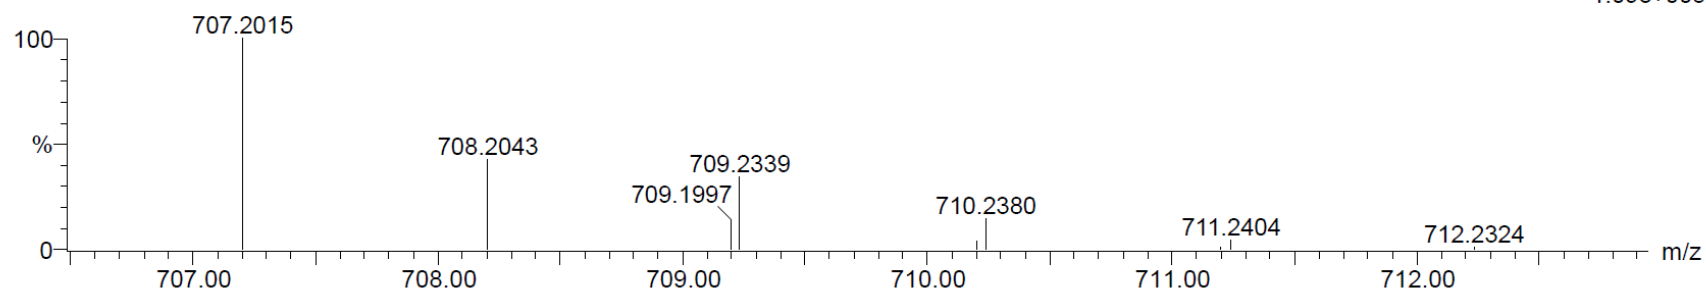

Minimum: 80.00  
Maximum: 100.00

| Mass     | RA     | Calc. Mass | mDa  | PPM  | DBE  | i-FIT | Norm  | Conf (%) | Formula            |
|----------|--------|------------|------|------|------|-------|-------|----------|--------------------|
| 707.2015 | 100.00 | 707.2015   | 0.0  | 0.0  | 18.5 | 47.2  | 4.072 | 1.70     | C36 H40 N2 O7 P S2 |
|          |        | 707.2031   | -1.6 | -2.3 | 13.5 | 47.0  | 3.873 | 2.08     | C34 H45 O8 P2 S2   |
|          |        | 707.1997   | 1.8  | 2.5  | 18.5 | 43.2  | 0.039 | 96.22    | C37 H41 O8 P2 S    |

Panel A

## Elemental Composition Report

Page 1

Tolerance = 5.0 mDa / DBE: min = -1.5, max = 50.0

Element prediction: Off

Number of isotope peaks used for i-FIT = 3

Monoisotopic Mass, Even Electron Ions

444 formula(e) evaluated with 2 results within limits (up to 50 closest results for each mass)

Elements Used:

C: 0-45 H: 0-47 N: 0-5 O: 0-8 P: 0-2 S: 0-2

A. Antczak

180508\_ATA\_5\_neg 10 (0.265) AM2 (Ar,40000.0,0.00,0.00); Cm (6:18-50:63)

1: TOF MS ES-  
4.76e+005

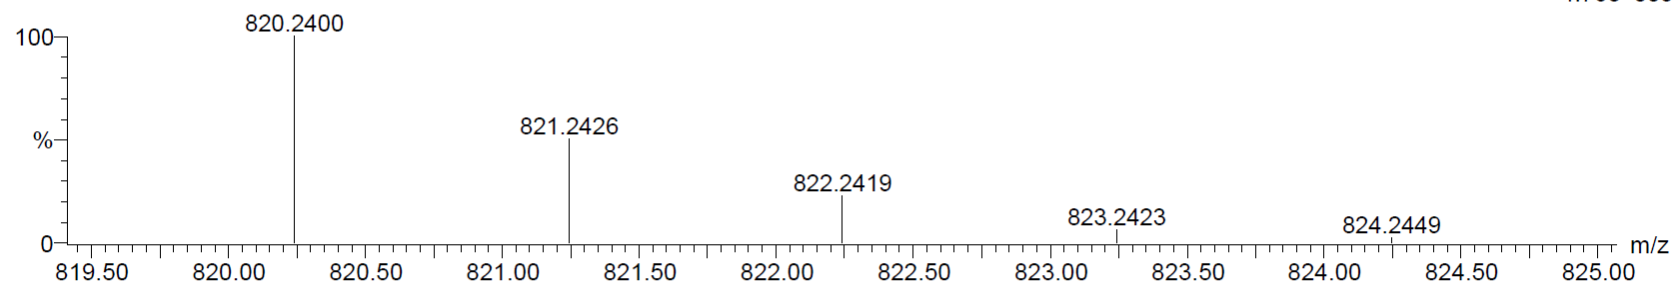

Minimum: 80.00  
Maximum: 100.00

| Mass     | RA     | Calc. Mass | mDa | PPM | DBE  | i-FIT | Norm   | Conf (%) | Formula            |
|----------|--------|------------|-----|-----|------|-------|--------|----------|--------------------|
| 820.2400 | 100.00 | 820.2392   | 0.8 | 1.0 | 25.5 | 16.2  | 0.000  | 100.00   | C43 H43 N5 O6 P S2 |
|          |        | 820.2375   | 2.5 | 3.0 | 25.5 | 27.3  | 11.159 | 0.00     | C44 H44 N3 O7 P2 S |

Panel B

## Elemental Composition Report

Page 1

Tolerance = 5.0 mDa / DBE: min = -1.5, max = 50.0

Element prediction: Off

Number of isotope peaks used for i-FIT = 3

Monoisotopic Mass, Even Electron Ions

496 formula(e) evaluated with 6 results within limits (up to 50 closest results for each mass)

Elements Used:

C: 0-45 H: 0-47 N: 0-5 O: 0-8 S: 0-2 P: 0-2

A. Antczak

180508\_ATA\_1\_neg\_2 10 (0.265) AM2 (Ar,40000.0,0.00,0.00); Cm (6:16-19:62)

1: TOF MS ES-  
8.52e+004

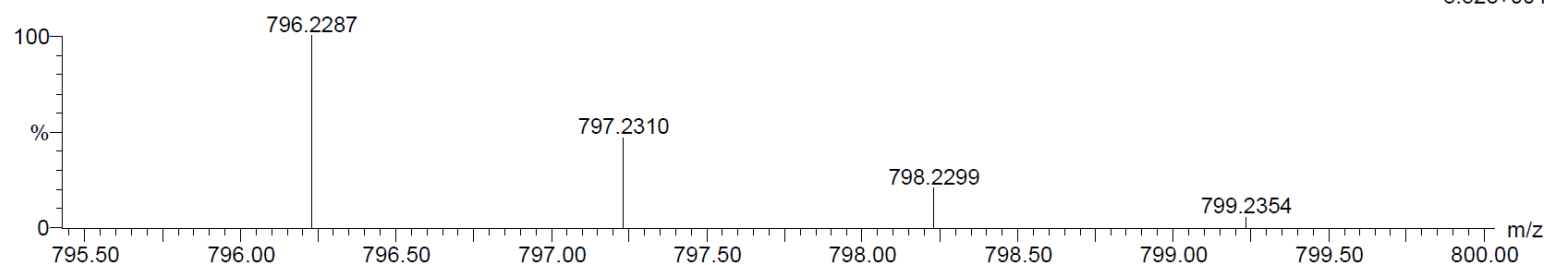

Minimum: 80.00 -1.5  
Maximum: 100.00 5.0 10.0 50.0

| Mass     | RA     | Calc. Mass | mDa  | PPM  | DBE  | i-FIT | Norm  | Conf (%) | Formula             |
|----------|--------|------------|------|------|------|-------|-------|----------|---------------------|
| 796.2287 | 100.00 | 796.2280   | 0.7  | 0.9  | 23.5 | 17.3  | 1.033 | 35.59    | C42 H43 N3 O7 S2 P  |
|          |        | 796.2276   | 1.1  | 1.4  | 28.5 | 22.0  | 5.716 | 0.33     | C44 H40 N5 O4 S P2  |
|          |        | 796.2310   | -2.3 | -2.9 | 23.5 | 16.8  | 0.485 | 61.58    | C41 H44 N5 O4 S2 P2 |
|          |        | 796.2264   | 2.3  | 2.9  | 28.5 | 20.3  | 4.008 | 1.82     | C44 H38 N5 O6 S2    |
|          |        | 796.2263   | 2.4  | 3.0  | 23.5 | 21.6  | 5.277 | 0.51     | C43 H44 N O8 S P2   |
|          |        | 796.2246   | 4.1  | 5.1  | 28.5 | 22.6  | 6.313 | 0.18     | C45 H39 N3 O7 S P   |

Panel C

## Elemental Composition Report

### Single Mass Analysis

Tolerance = 3.0 PPM / DBE: min = -1.5, max = 50.0

Element prediction: Off

Number of isotope peaks used for i-FIT = 3

Monoisotopic Mass, Even Electron Ions

614 formula(e) evaluated with 2 results within limits (up to 50 closest results for each mass)

Elements Used:

C: 0-45 H: 0-50 N: 0-6 O: 0-8 P: 0-1 S: 0-3

A.Tomaszewska

180518\_guaG\_OTP 7 (0.194) Cm (5:10-17:30)

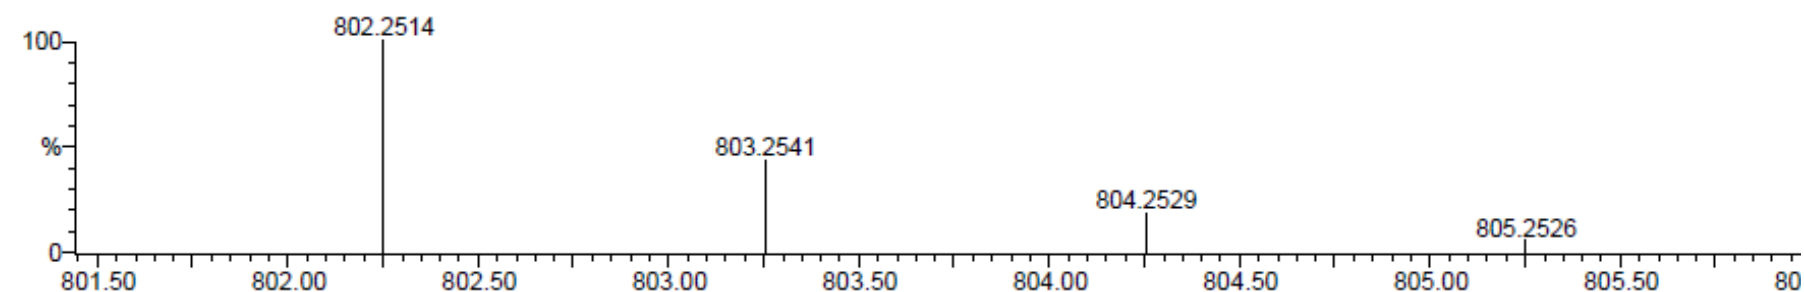

Minimum: -1.5  
Maximum: 15.0 3.0 50.0

| Mass     | Calc. Mass | mDa  | PPM  | DBE  | i-FIT | Norm  | Conf (%) | Formula            |
|----------|------------|------|------|------|-------|-------|----------|--------------------|
| 802.2514 | 802.2498   | 1.6  | 2.0  | 21.5 | 26.9  | 0.041 | 96.02    | C40 H45 N5 O7 P S2 |
|          | 802.2532   | -1.8 | -2.2 | 16.5 | 30.1  | 3.225 | 3.98     | C37 H49 N5 O7 P S3 |

Panel D

Figure 4S. HRMS spectra for **5a-d** (panel A, B, C, and D, respectively).

Electronic Supplementary Information  
Phosphorothioate Analogs of Glycol Nucleic Acids

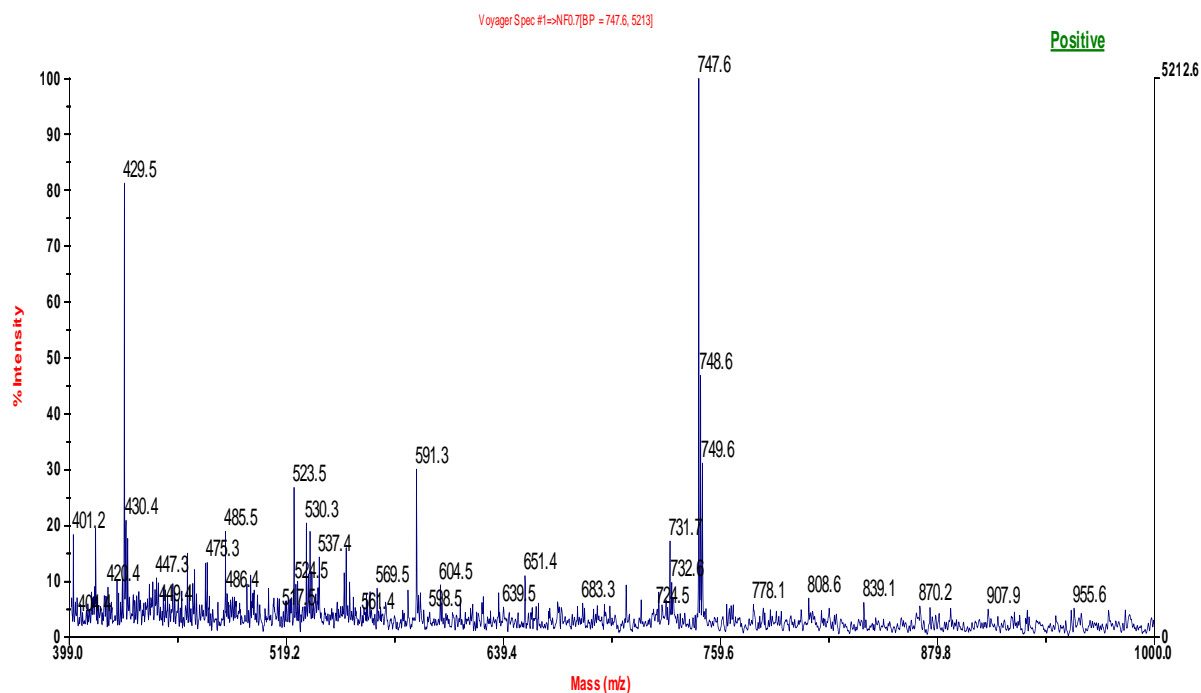

Panel A.

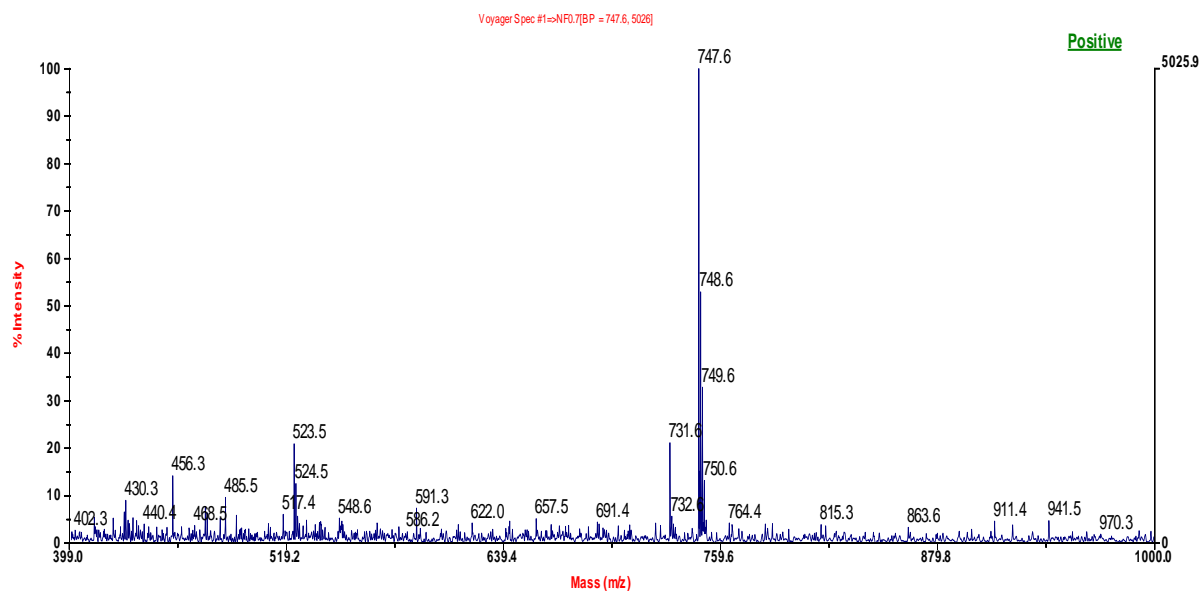

Panel B.

Figure 5S. MALDI-TOF MS spectrum for *fast*- and *slow*-eluting **5a** (panel A and B, respectively). 3-hydroxypicolinic acid (50 mg/mL in 50% ACN/H<sub>2</sub>O) and ammonium citrate dibasic (50 mg/mL in H<sub>2</sub>O 8:1 (v/v)) used as a matrix.

Electronic Supplementary Information  
Phosphorothioate Analogs of Glycol Nucleic Acids

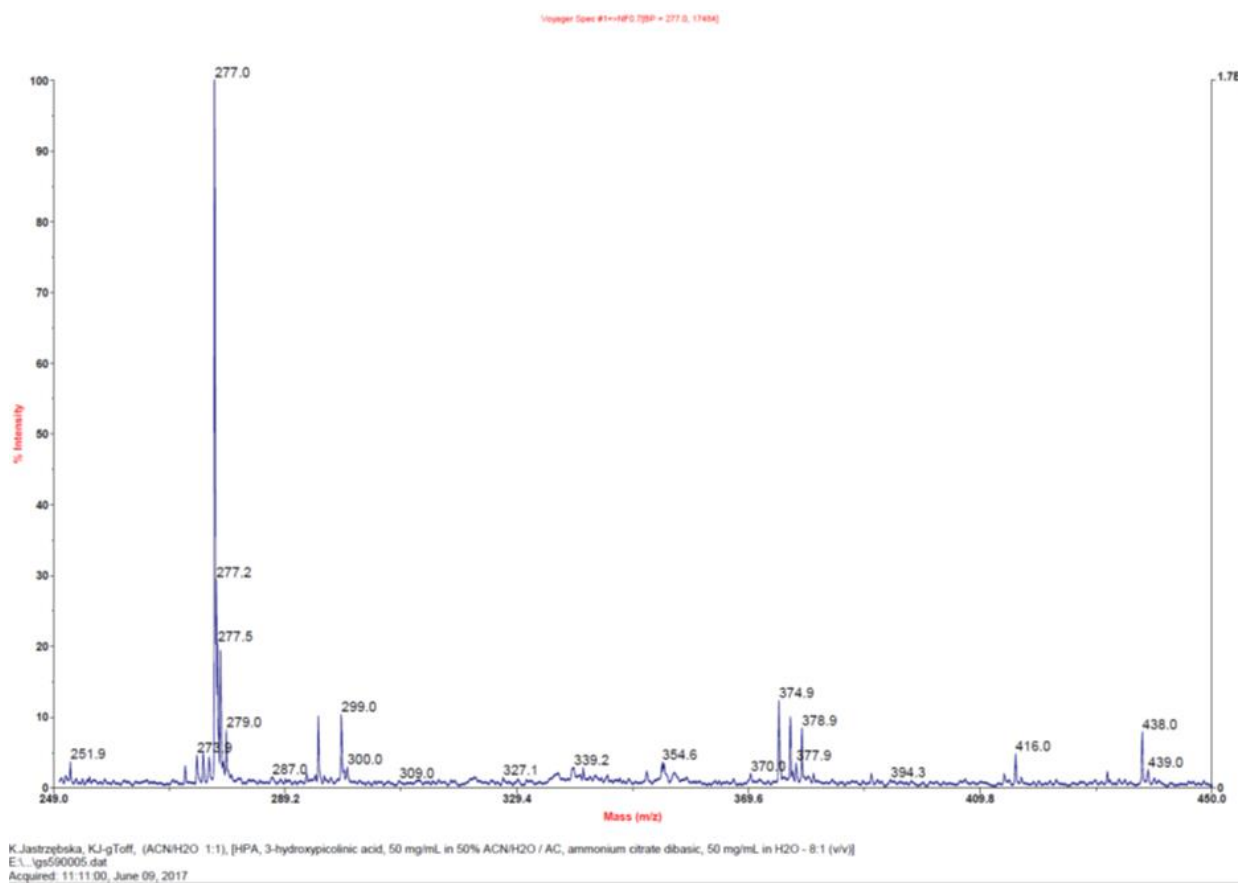

Figure 6S. MS data for  $c^G$ TMPs isolated from the mixture after detritylation of **5a**.

Electronic Supplementary Information  
Phosphorothioate Analogs of Glycol Nucleic Acids

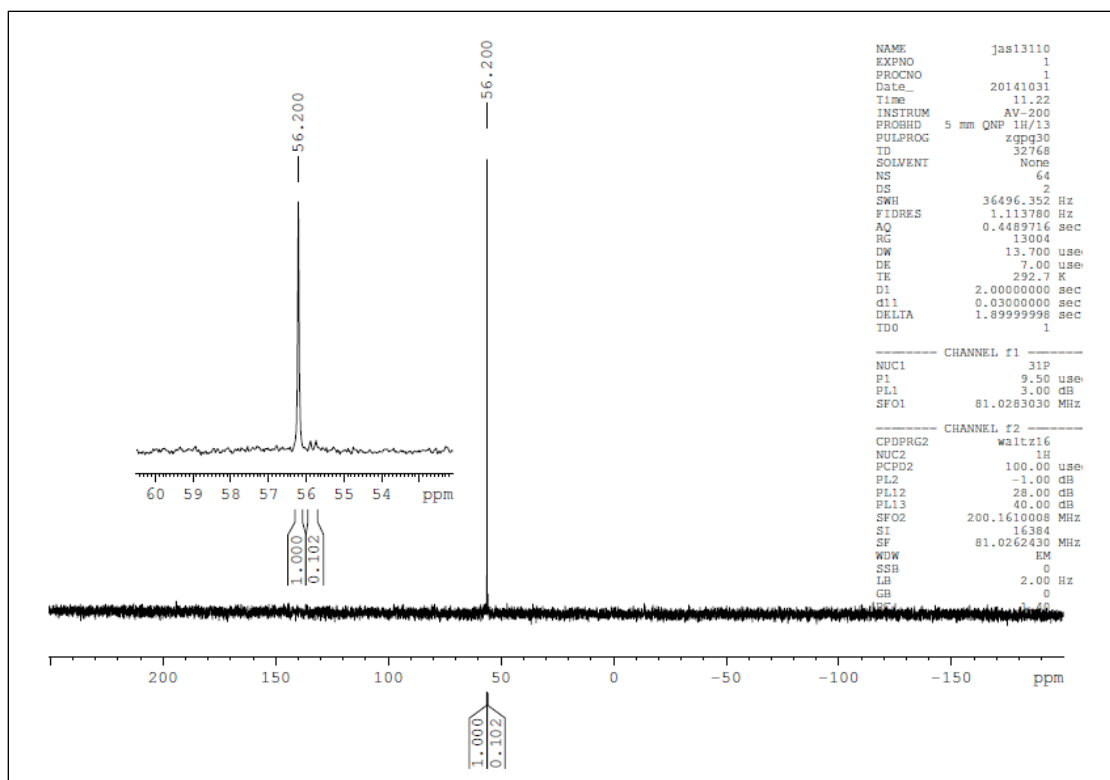

Panel A

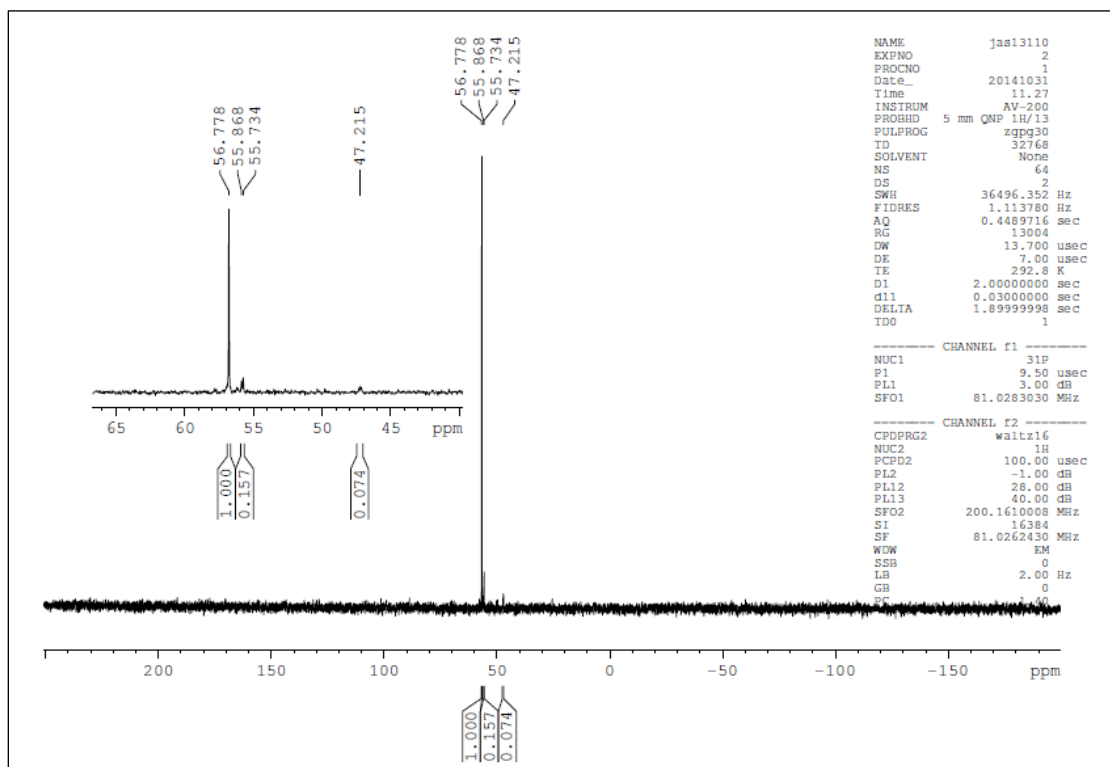

Panel B

Figure 7S.  $^{31}\text{P}$  NMR spectra (no deuterated solvent) for  $\text{DMT-}^{\text{Bz}}\text{C}_{\text{PS}}\text{T}_{\text{Ac}}$  **10c** obtained from *fast-5c* and *slow-5c*, panel A and B, respectively. The monomer **5c** was obtained from *R*-(+)-glycidol.

Electronic Supplementary Information  
Phosphorothioate Analogs of Glycol Nucleic Acids

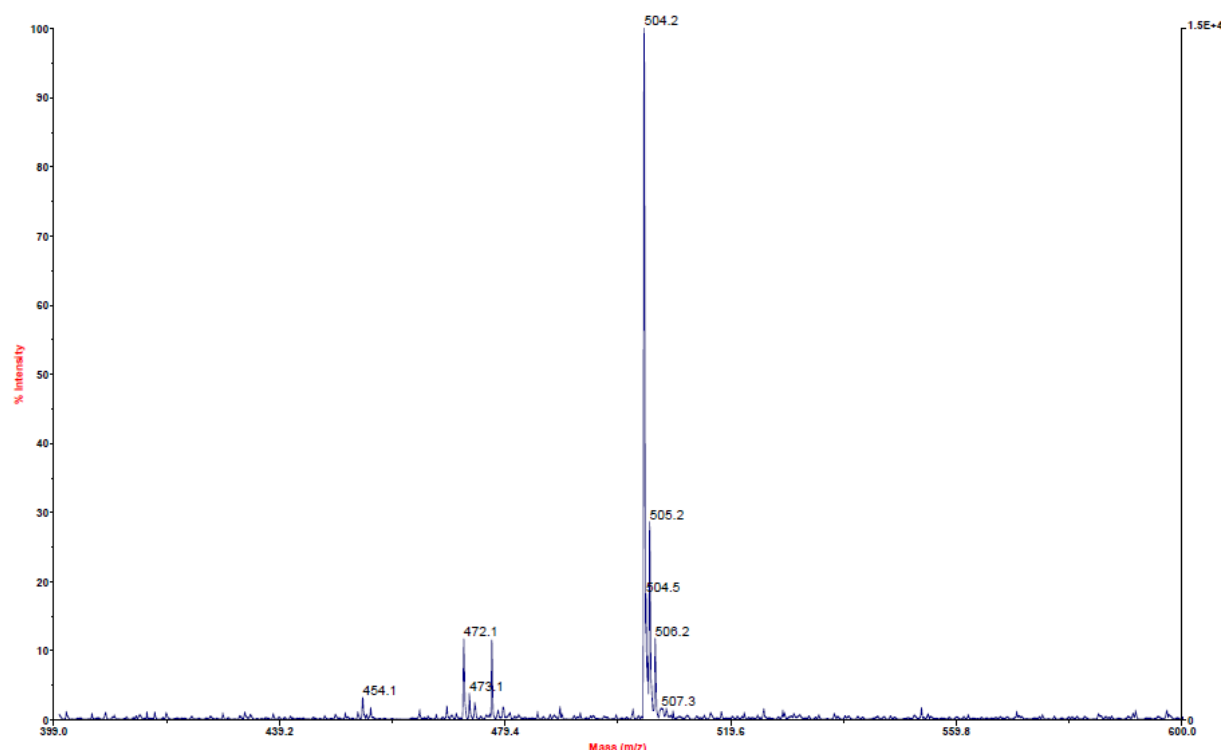

Panel A

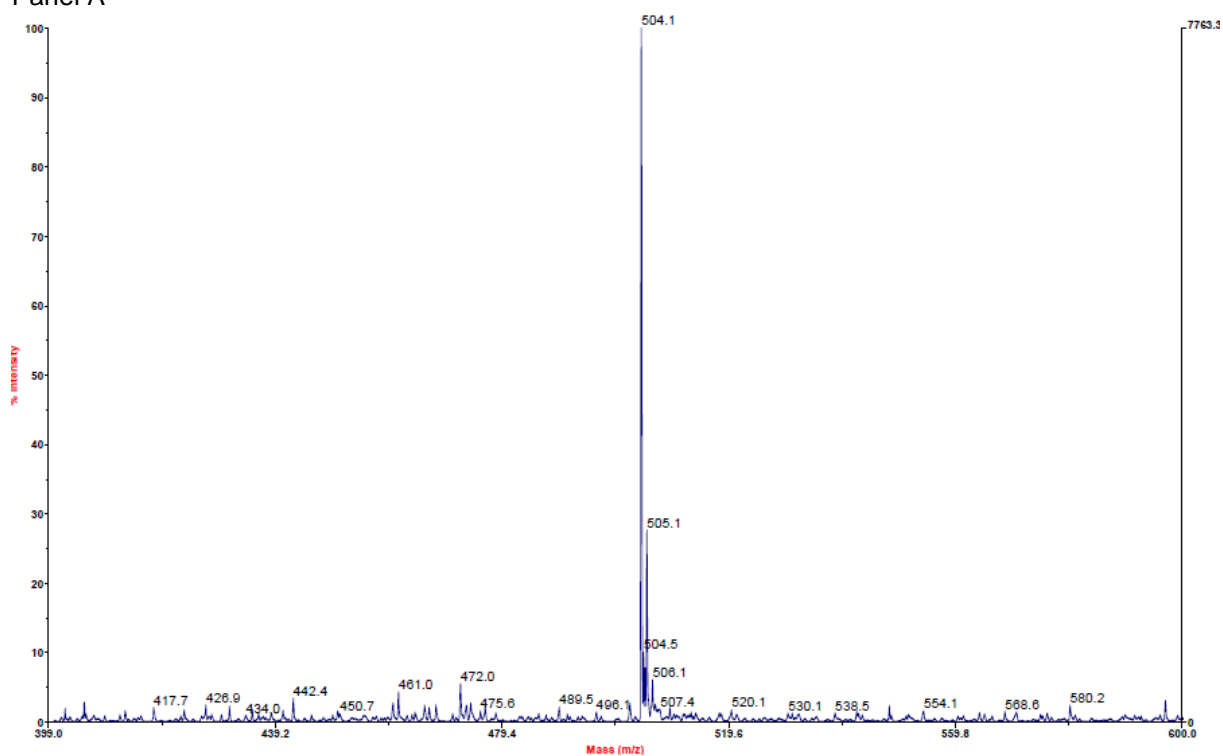

Panel B

Figure 8S. MALDI TOF MS spectra for RP HPLC isolated  $^9\text{C}_{\text{PS}}\text{T}$  **11c** obtained from *fast-5c* (panel A) and *slow-5c* (panel B). The monomer **5c** was obtained from *R*-(+)-glycidol. Molecular mass (calc. for  $\text{C}_{17}\text{H}_{23}\text{N}_5\text{O}_9\text{PS}$ ) 504.44,  $m/z$  found 504.2 and 504.1.

Electronic Supplementary Information  
Phosphorothioate Analogs of Glycol Nucleic Acids

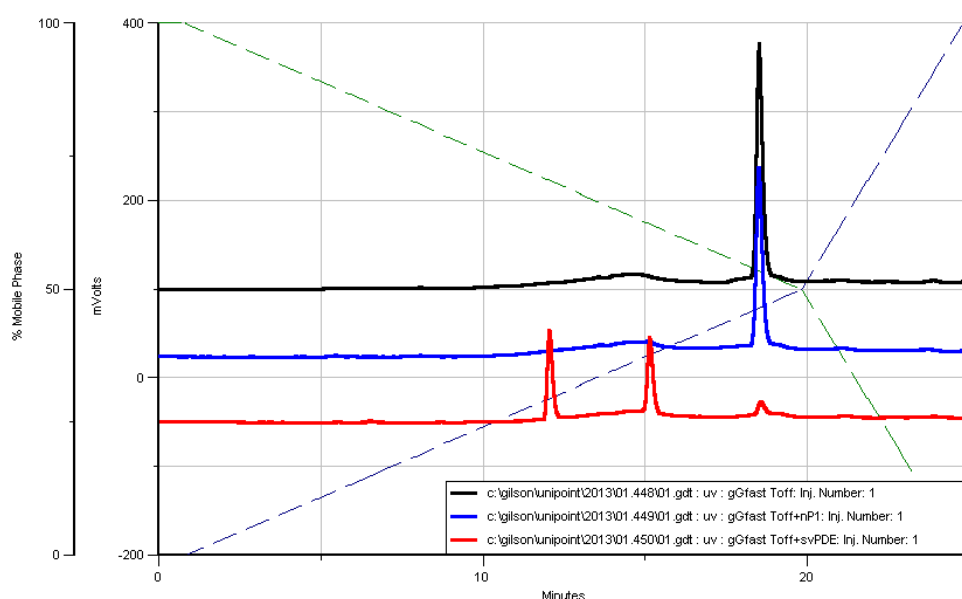

Figure 9S. RP HPLC profiles for three samples: 1)  $^6\text{G}_{\text{PS}}\text{T}$  **11d** obtained from *fast-5d* (a black line), hydrolysis of  $^6\text{G}_{\text{PS}}\text{T}$  with svPDE (a red line) and hydrolysis  $^6\text{G}_{\text{PS}}\text{T}$  with nP1 (a blue line). An ACE 5 C 18-AR Column, 250×4.6 mm; flow rate 1mL/min, A buffer: 0.1 M TEAB, B buffer: 40%  $\text{CH}_3\text{CN}$  in 0.1 TEAB, Gradient: 0-50% of B buffer in 20 min, 50-100% of B buffer in 7 min.

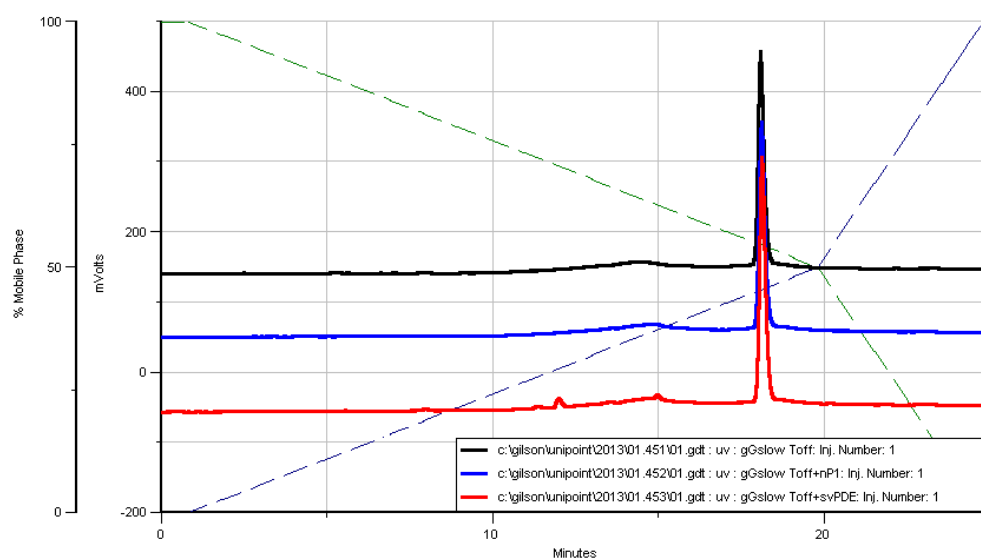

Figure 10S. RP HPLC profiles for three samples: 1)  $^6\text{G}_{\text{PS}}\text{T}$  **11d** obtained from *slow-5d* (a black line), hydrolysis of **11d** with svPDE (a red line) and hydrolysis of **11d** with nP1 (a blue line). An ACE 5 C 18-AR column, 250×4.6 mm; flow rate 1mL/min, A buffer: 0.1 M TEAB, B buffer: 40%  $\text{CH}_3\text{CN}$  in 0.1 TEAB, Gradient: 0-50% of B buffer in 20 min.

Electronic Supplementary Information  
Phosphorothioate Analogs of Glycol Nucleic Acids

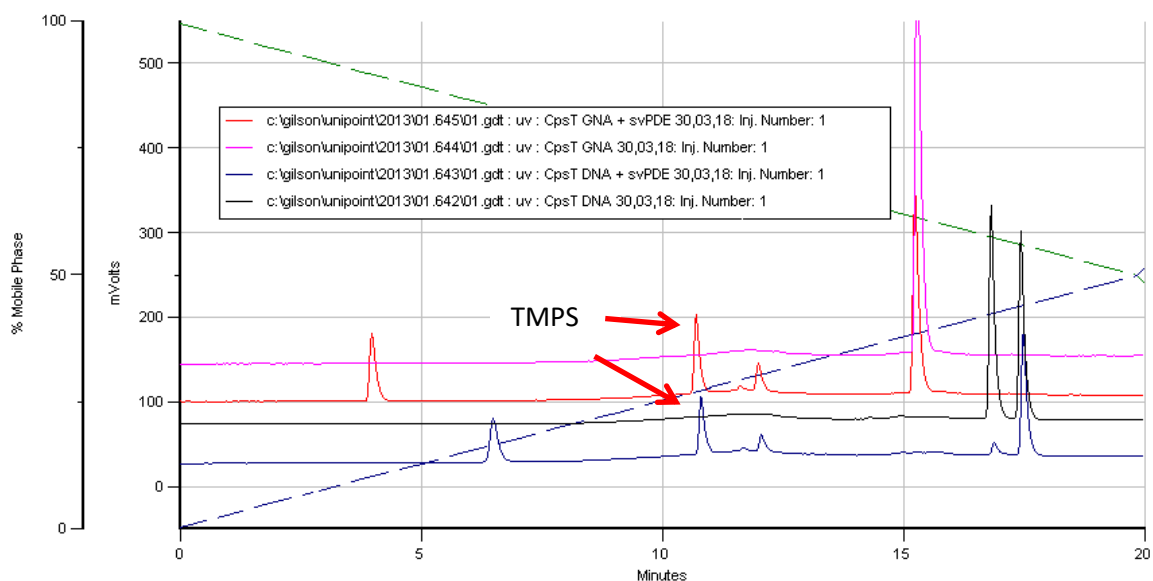

Figure 11S. HPLC profiles recorded for four samples: 1) d(C<sub>PS</sub>T), a mixture of both P-diastereomers – a black line; 2) d(C<sub>PS</sub>T), a mixture of both P-diastereomers, treated with svPDE – a blue line; 3) <sup>6</sup>C<sub>PS</sub>T **10c** (derived from *fast-5c*) treated with svPDE – a red line; 4) <sup>6</sup>C<sub>PS</sub>T **10c** (derived from *fast-5c*) – a pink line. A Kinetex 5 $\mu$  C18 column, 250 $\times$ 4.6 mm; flow rate 1mL/min, A buffer: 0.1 M TEAB, B buffer: 40% CH<sub>3</sub>CN in 0.1 TEAB, Gradient: 0-50% of B buffer in 20 min.

Electronic Supplementary Information  
Phosphorothioate Analogs of Glycol Nucleic Acids

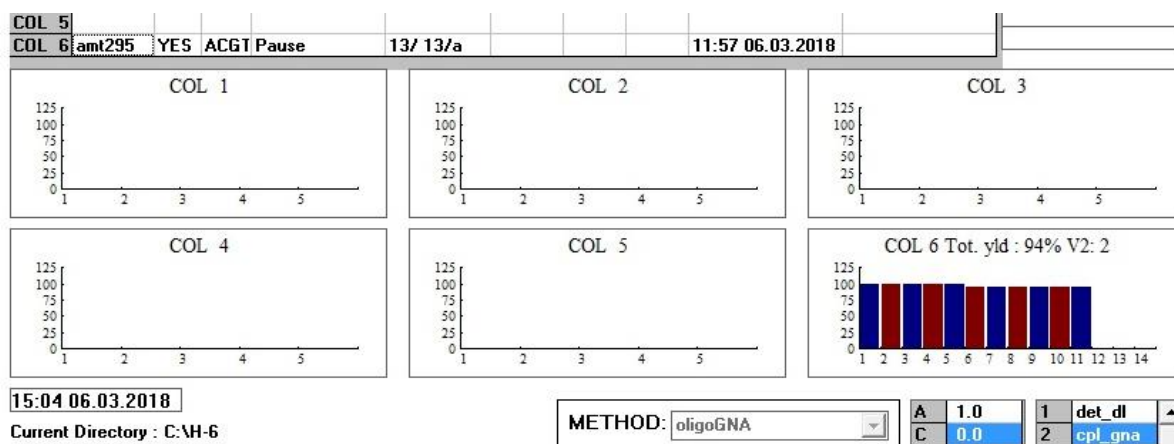

Figure 12S. Decay of the trityl cation absorption (after the 10<sup>th</sup> coupling) during the synthesis of (<sup>6</sup>U<sub>PS</sub>)<sub>11</sub>dA as measured photometrically by the internal monitor in the automated H-6 DNA/RNA synthesizer. From the total yield 94% a repetitive yield 99.2% was calculated (0.992<sup>10</sup>).

Electronic Supplementary Information  
Phosphorothioate Analogs of Glycol Nucleic Acids

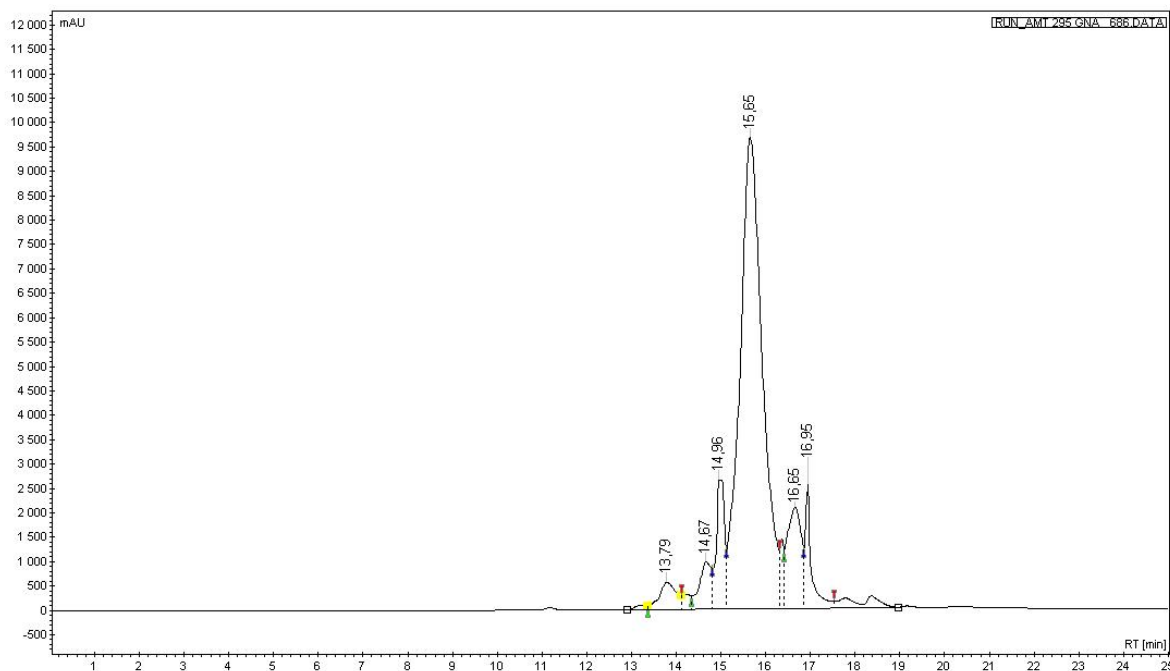

Figure 13S. RP HPLC analysis of ( $^6\text{U}_{\text{PS}}$ )<sub>11</sub>dA after treatment with DBU. A Phenomenex Polymer X column, 10 $\mu\text{m}$  RP-1 100 $\text{\AA}$ , 250x10.0mm; Buffers: A = 0.1 M TEAB, B= 40%  $\text{CH}_3\text{CN}$  in 0.1 MTEAB; flow rate 2.5 ml/min;

Gradient program:

| t (min) | %B  |
|---------|-----|
| 0       | 0   |
| 10      | 50  |
| 12      | 70  |
| 14      | 100 |
| 20      | 100 |

Electronic Supplementary Information  
Phosphorothioate Analogs of Glycol Nucleic Acids

ATM-295.Tomaszewska-Antczak, linear neg

Matrix: HPA 50 mg/mL H<sub>2</sub>O/ACN 1:1 v/v, AC 50 mg/mL H<sub>2</sub>O/ACN 1:1 v/v; HPA/AC 8:1

Data: ha920003.I20[c] 14 Mar 2018 17:25 Cal: LIN\_NEG 13 May 2010 11:44

%Int. 48 mV[sum= 5315 mV] Profiles 1-110 Smooth Av 15 -Baseline 1000

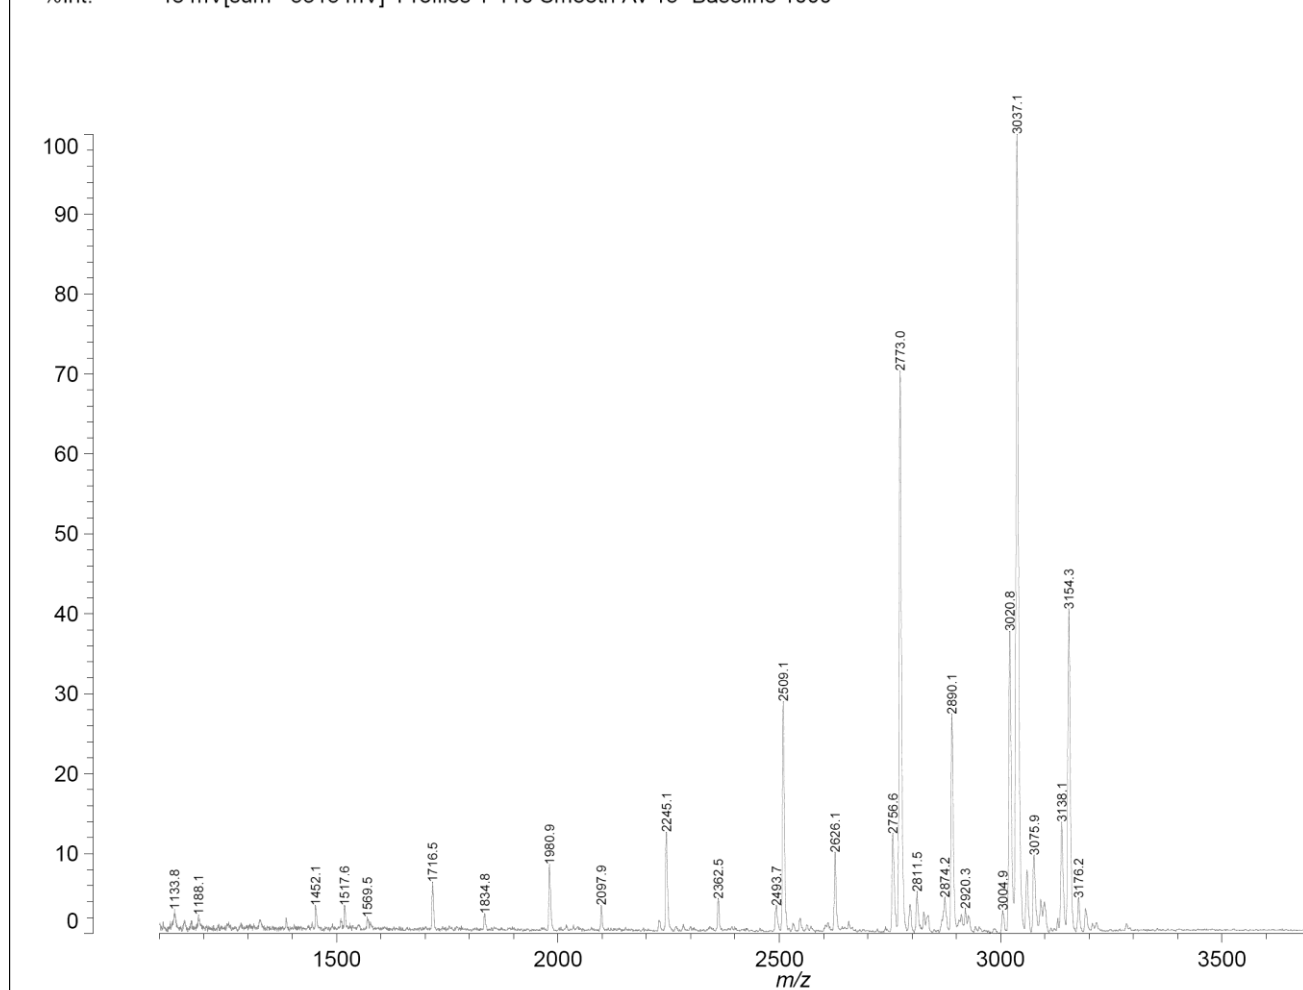

Figure 14S. MALDI-TOF MS analysis of the fraction collected during RP HPLC analysis of ( $^G$ U<sub>PS</sub>)<sub>11</sub>dA after treatment with DBU (a broad peak eluting at 15.65 min, see Figure 13S).

Electronic Supplementary Information  
Phosphorothioate Analogs of Glycol Nucleic Acids

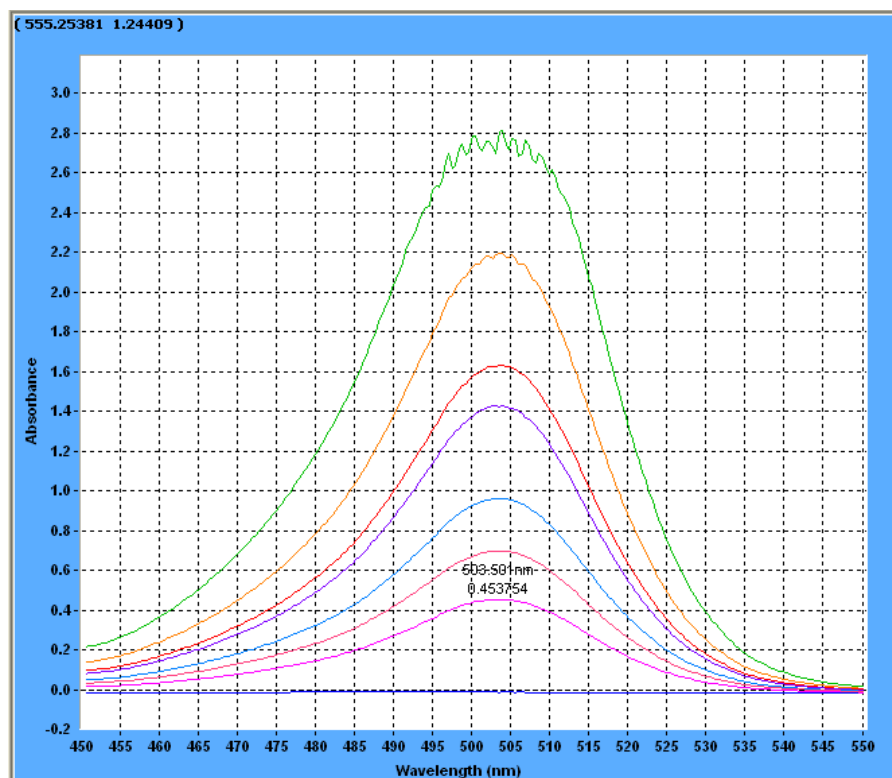

Figure 15S. Decay of the trityl cation absorption during the manual synthesis of  $S_p$ -17 ( $A^6TG^6CG^6CAT$ ) measured photometrically.

Electronic Supplementary Information  
Phosphorothioate Analogs of Glycol Nucleic Acids

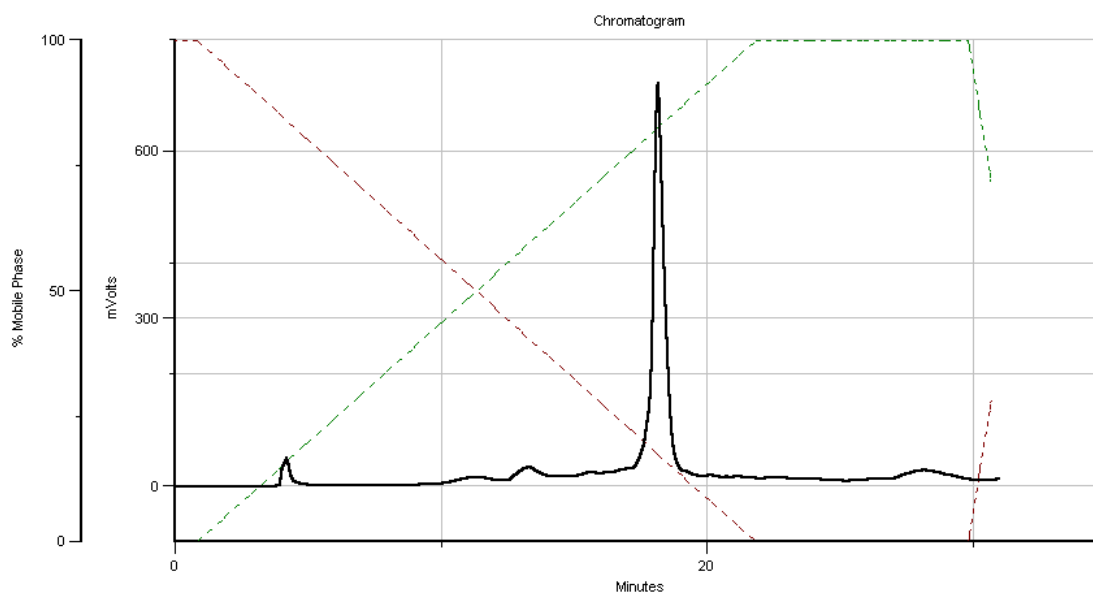

Figure 16S. RP HPLC profile for the detritylated *Sp*-17 oligomer. A Kinetex 5 $\mu$  C18 column, 250 $\times$ 4.6 mm; flow rate 1mL/min, A buffer: 0.1 M TEAB, B buffer: 40% CH<sub>3</sub>CN in 0.1 TEAB, Gradient: 0-100% of B buffer in 22 min.

Electronic Supplementary Information  
Phosphorothioate Analogs of Glycol Nucleic Acids

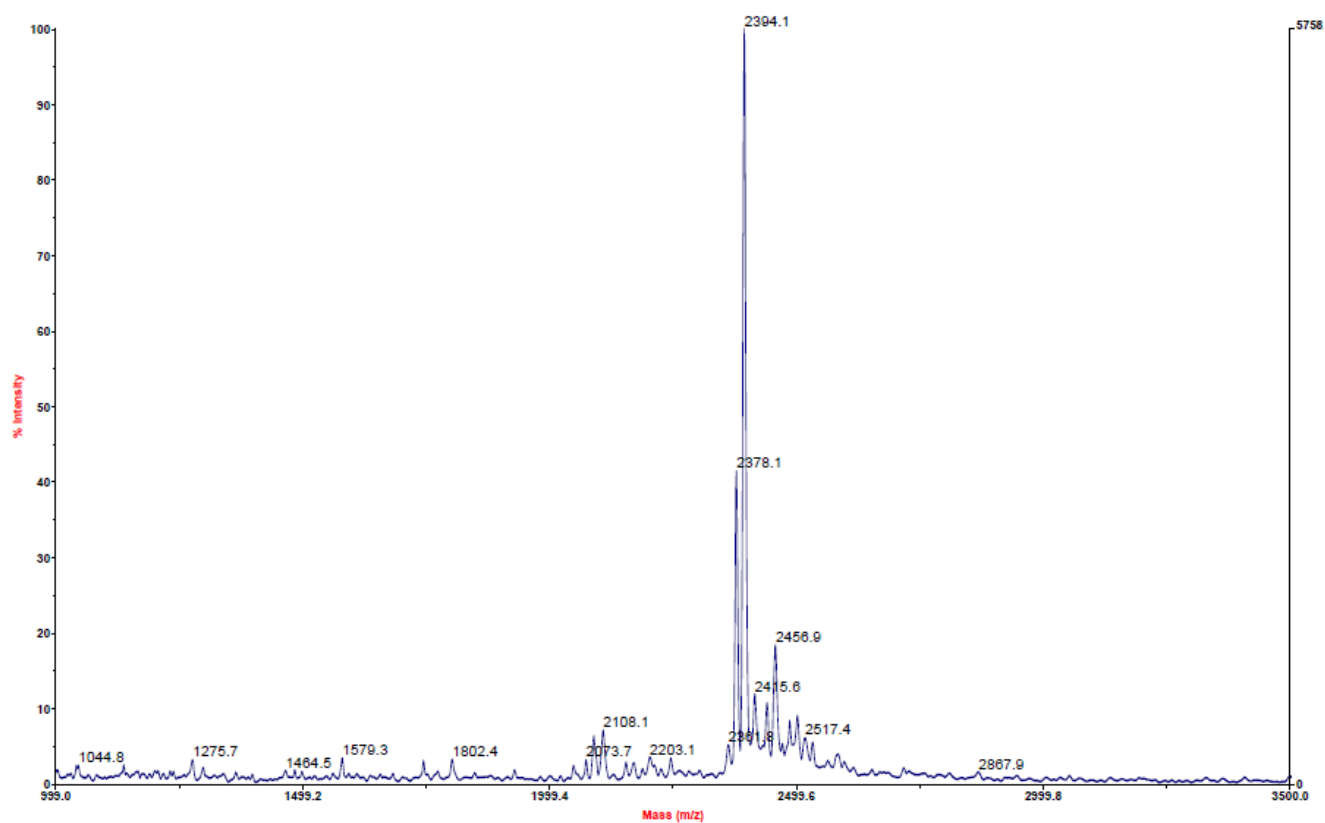

Figure 17S. MALDI-TOF MS spectrum for S<sub>P</sub>-17 oligomer; molecular mass calculated 2395, found 2394.1

Electronic Supplementary Information  
Phosphorothioate Analogs of Glycol Nucleic Acids

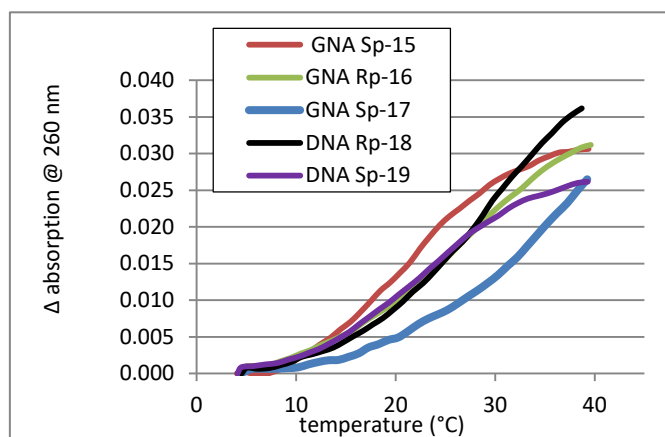

Figure 18S: Increase of UV absorption at 260 nm in melting experiments for selfcomplementary oligomers **15-19** (dissolved in pH 7.2 buffer containing 10 mM Tris-HCl, 100 mM NaCl, and 10 mM MgCl<sub>2</sub>).

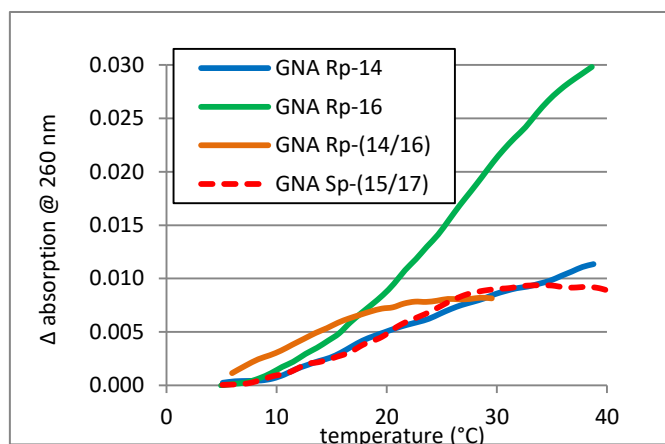

Figure 19S: Increase of UV absorption at 260 nm in melting experiments for selfcomplementary oligomers **14, 16** and heteroduplexes **14/16** and **15/17** (dissolved in pH 7.2 buffer containing 10 mM Tris-HCl, 100 mM NaCl, and 10 mM MgCl<sub>2</sub>).

Electronic Supplementary Information  
Phosphorothioate Analogs of Glycol Nucleic Acids

**Table 2S.** Melting temperatures for mixtures of R<sub>P</sub>-PS-(GNA/DNA) **14** or **16**, and S<sub>P</sub>-PS-(GNA/DNA) **15** or **17** with **DNA** (d(ATGCGCAT)) or **(m)RNA** ((2'-OMe)-AUGCGCAU) templates. Melting temperatures for homoduplexes **DNA/DNA** and **(m)RNA/(m)RNA** are given as the reference. Temperature gradients of 1°C/min for annealing and 0.5°C/min for melting were applied.

|                                        | T <sub>m</sub> (°C) |        |                                                                          |                    |                                                                |                    |
|----------------------------------------|---------------------|--------|--------------------------------------------------------------------------|--------------------|----------------------------------------------------------------|--------------------|
| template                               | DNA                 | (m)RNA | 5'-( <sup>G</sup> A T <sup>G</sup> C <sup>G</sup> C <sup>G</sup> A T)-3' |                    | 5'-(A <sup>G</sup> T G <sup>G</sup> C G <sup>G</sup> C A T)-3' |                    |
|                                        |                     |        | R <sub>P</sub> -14                                                       | S <sub>P</sub> -15 | R <sub>P</sub> -16                                             | S <sub>P</sub> -17 |
| <b>DNA</b><br>d(ATGCGCAT)              | 43                  | ×      | 41                                                                       | 42                 | 42                                                             | 41                 |
| <b>(m)RNA</b><br>(2'-OMe)-<br>AUGCGCAU | ×                   | 62     | 59                                                                       | 60                 | 59                                                             | 58                 |

Electronic Supplementary Information  
Phosphorothioate Analogs of Glycol Nucleic Acids

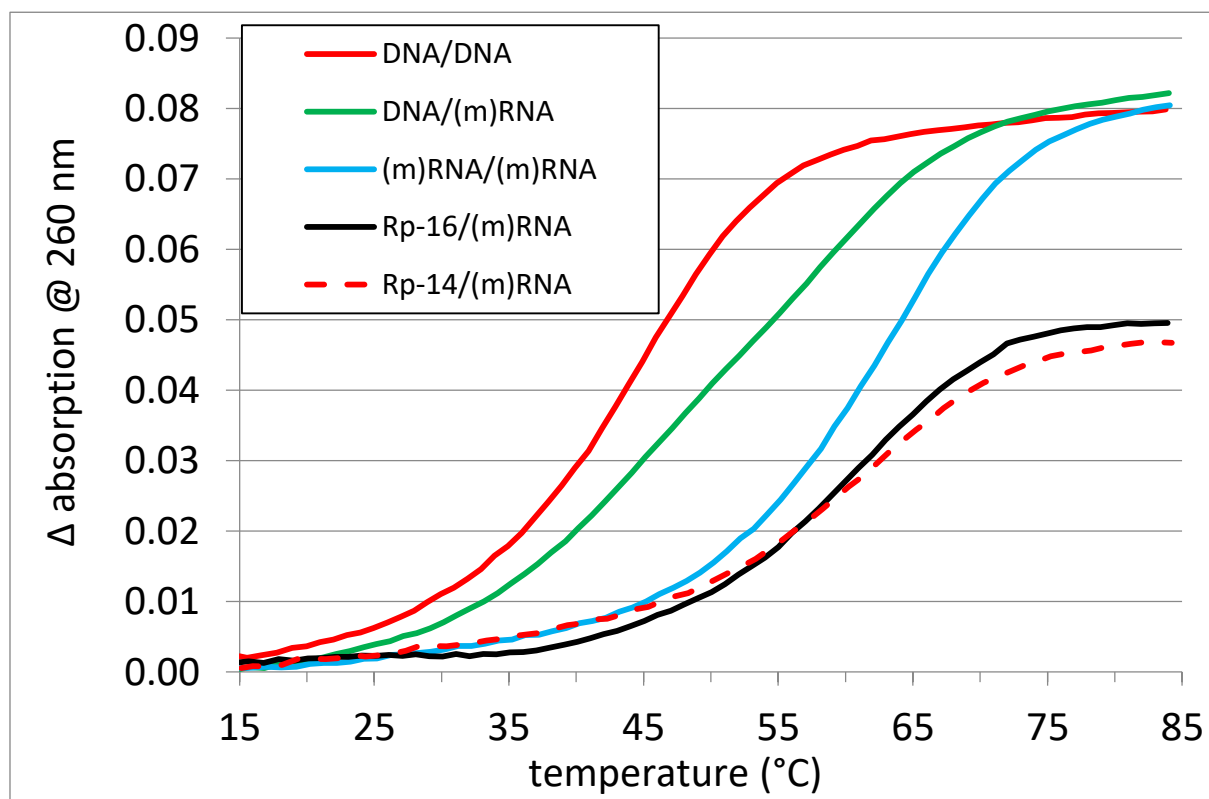

Figure 20S: Increase of UV absorption at 260 nm in melting experiments for selfcomplementary **DNA**, **(m)RNA** and for mixtures **DNA/(m)RNA**, **14/(m)RNA** and **16/(m)RNA** (dissolved in pH 7.2 buffer containing 10 mM Tris-HCl, 100 mM NaCl, and 10 mM MgCl<sub>2</sub>).

Electronic Supplementary Information  
Phosphorothioate Analogs of Glycol Nucleic Acids

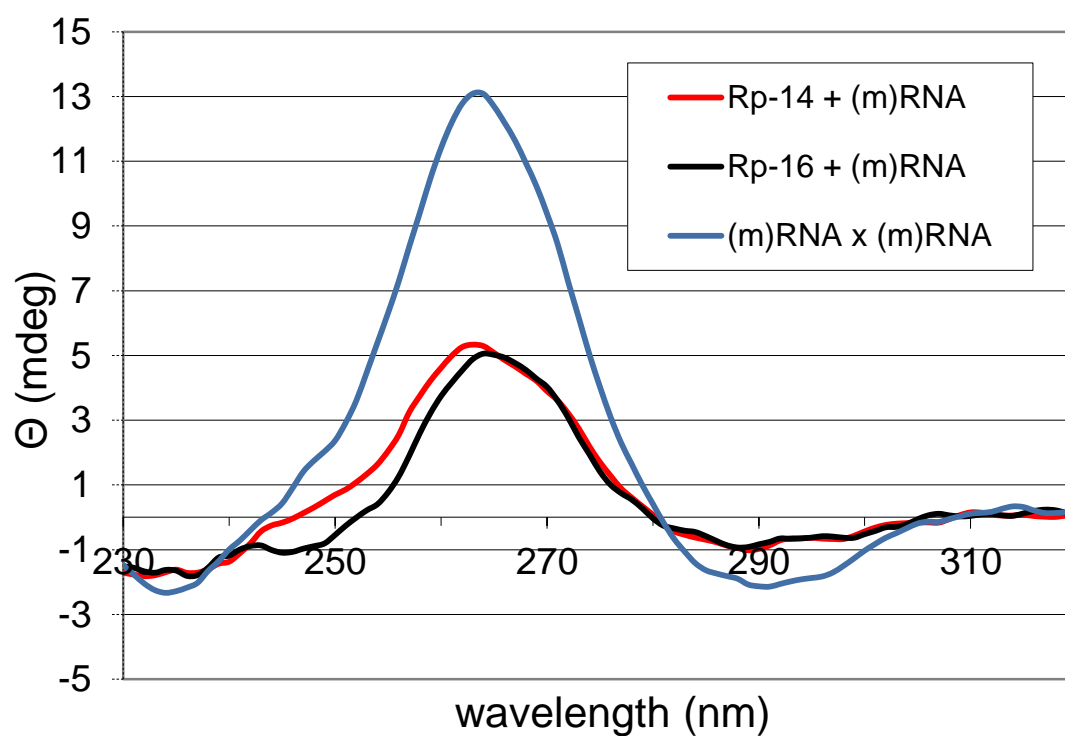

Figure 21S: CD spectra for the selfcomplementary oligomer **(m)RNA** and its mixture with **14** or **16** (dissolved in pH 7.2 buffer containing 10 mM Tris-HCl, 100 mM NaCl, and 10 mM  $\text{MgCl}_2$ ) recorded at room temperature.
